# Supplementary material
Source: PubMed Central journal article supplement (PMC7049972)
Supplement: supp_RA119.010683_155267_2_supp_465784_q4tk7h.pdf [file supp_RA119.010683_155267_2_supp_465784_q4tk7h.pdf]

## ***Supplemental Figure Legends***

### **Figure S1 Blot images of Figure 1**

Full-length blots used for Figure 1. The blot images in Figure 1 are enclosed with red dashed boxes. Molecular size marker on original blotting membrane are enclosed with black dashed boxes.

### **Figure S2 Role of cAMP-PKA-HSL signaling pathway in the bacterial growth of *C. pneumoniae* in murine adipocytes**

The number of infectious EB progeny of 3T3-L1 adipocytes at 24 h after Cpn MOI 5 infection in the presence or absence of (A) KH7 (adenyl cyclase inhibitor, 50  $\mu$ M), (B) H89 (PKA inhibitor, 50  $\mu$ M) or (C) DMSO 1% was determined using an inclusion forming unit (IFU) assay.  $n = 3$  per group, \* $p < 0.05$ , \*\* $p < 0.01$ , one-way ANOVA. Data are shown as the mean  $\pm$  SEM and are representative of at least three experiments.

### **Figure S3 Blot images of Figure 5**

Full-length blots used for Figure 5. The blot images in Figure 5 are enclosed with red dashed boxes. Molecular size marker on original blotting membrane are enclosed with black dashed boxes.

### **Figure S4 *S. aureus* or *L. monocytogenes* dose not induce the secretion of FABP4 from murine adipocytes.**

Secretion of FABP4 in cultured medium of 3T3-L1 adipocytes at 6 h after treatment with heat-killed *Staphylococcus aureus* and infection with *Listeria monocytogenes* was measured by ELISA. LDH assay using the supernatants was performed. As positive control, cells were lysed with 2% Trion X-100 containing culture medium. Data are shown as the mean  $\pm$  SEM and are representative of at least three experiments.

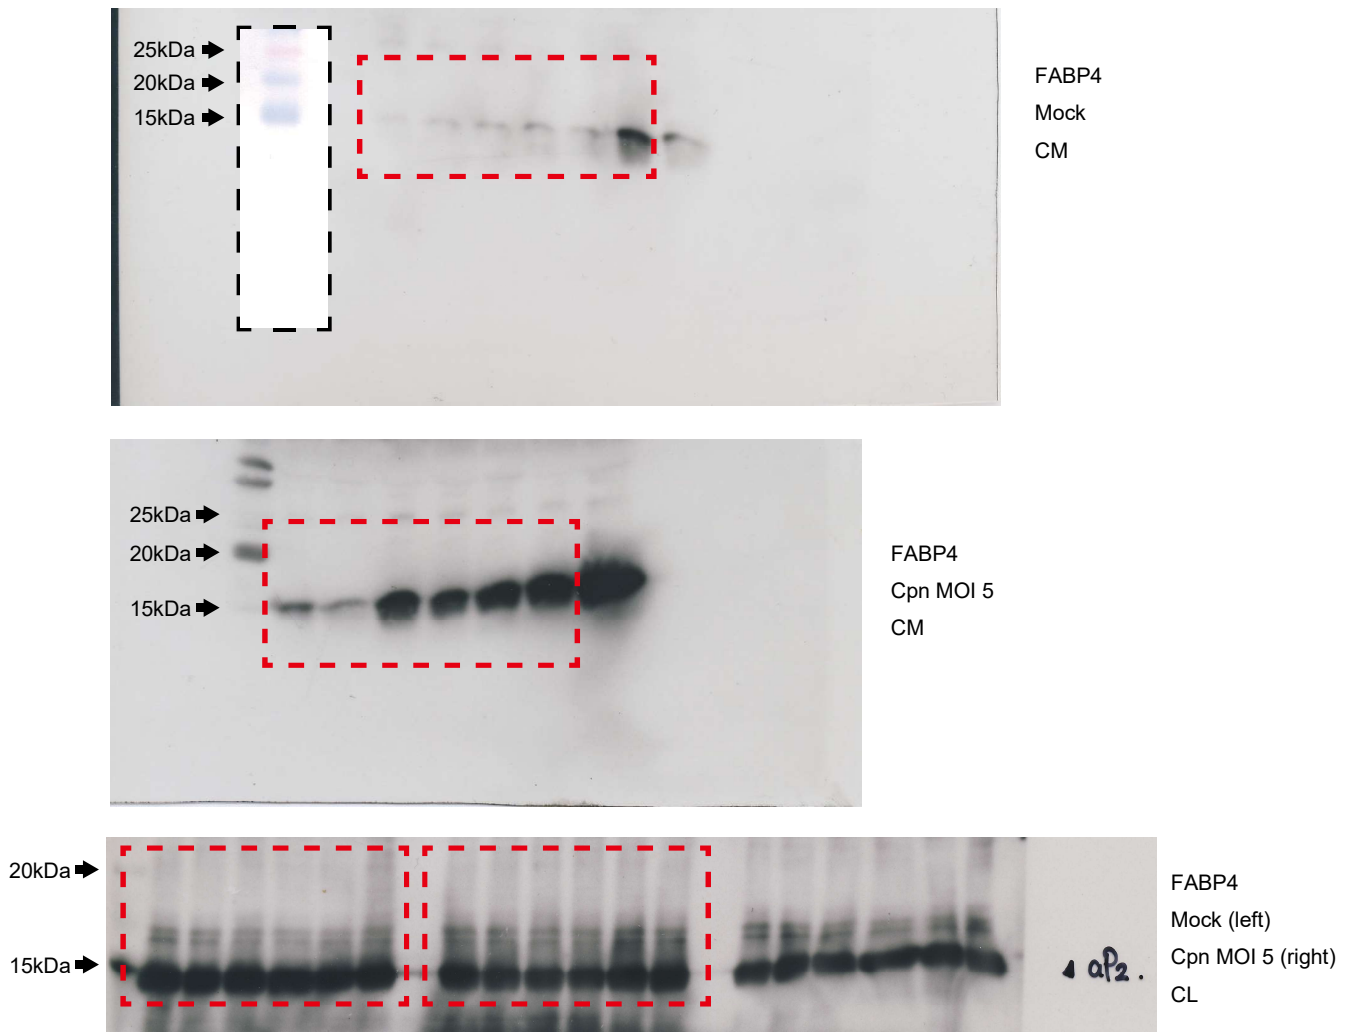

**Figure S1 Blot images of Figure 1**

Full-length blots used for Figure 1. The blot images in Figure 1 are enclosed with red dashed boxes. Molecular size marker on original blotting membrane are enclosed with black dashed boxes.

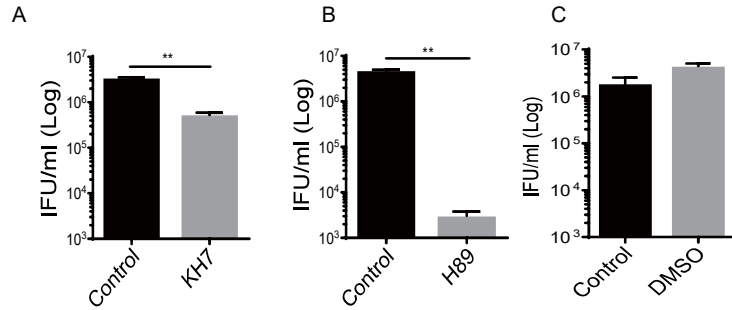

**Figure S2 Role of cAMP-PKA-HSL signaling pathway in the bacterial growth of *C. pneumoniae* in murine adipocytes**

The number of infectious EB progeny of 3T3-L1 adipocytes at 24 h after Cpn MOI 5 infection in the presence or absence of (A) KH7 (adenyl cyclase inhibitor, 50  $\mu$ M), (B) H89 (PKA inhibitor, 50  $\mu$ M) or (C) DMSO 1% was determined using an inclusion forming unit (IFU) assay.  $n = 3$  per group, \* $p < 0.05$ , \*\* $p < 0.01$ , one-way ANOVA. Data are shown as the mean  $\pm$  SEM and are representative of at least three experiments.

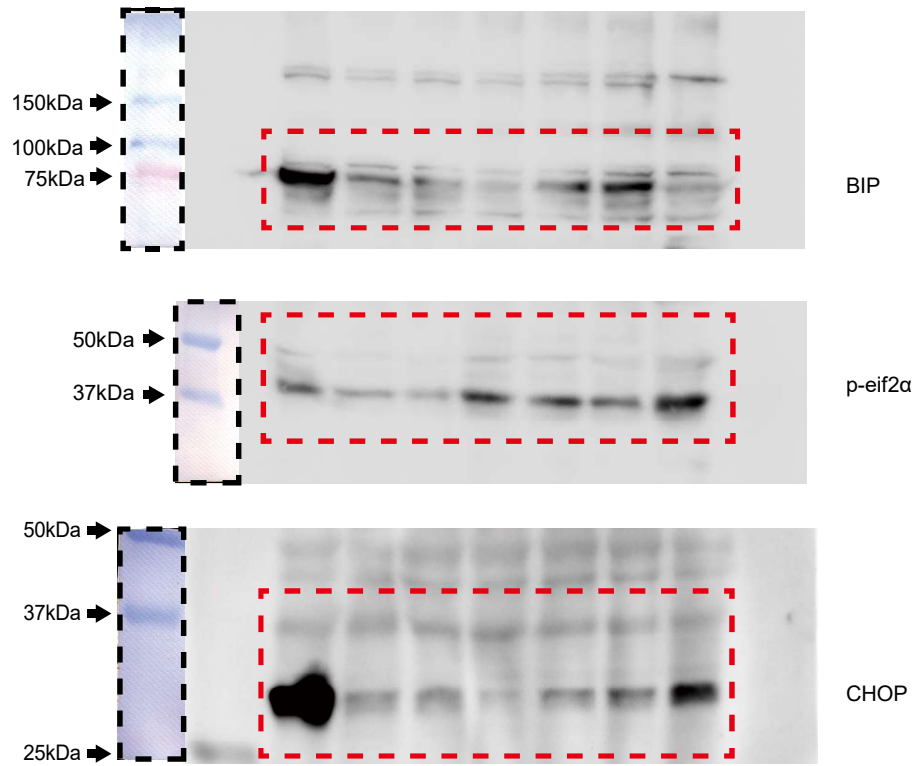

**Figure S3** Blot images of Figure 5

Full-length blots used for Figure 5. The blot images in Figure 5 are enclosed with red dashed boxes. Molecular size marker on original blotting membrane are enclosed with black dashed boxes.

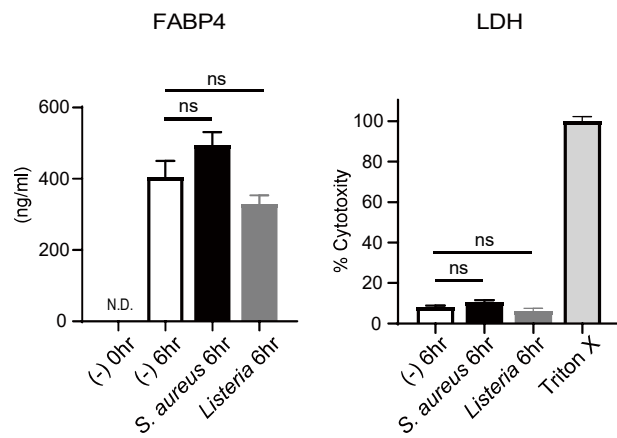

**Figure S4** *S. aureus* or *L. monocytogenes* dose not induce the secretion of FABP4 from murine adipocytes.

Secretion of FABP4 in cultured medium of 3T3-L1 adipocytes at 6 h after treatment with heat-killed *Staphylococcus aureus* and infection with *Listeria monocytogenes* was measured by ELISA. LDH assay using the supernatants was performed. As positive control, cells were lysed with 2% Triton X-100 containing culture medium. Data are shown as the mean  $\pm$  SEM and are representative of at least three experiments.
